# Supplementary material
Source: PubMed Central journal article supplement (PMC2885703)
Supplement: NIHMS174991-supplement-01.pdf [file NIHMS174991-supplement-01.pdf]

WISP1 blocks doxorubicin cardiotoxicity

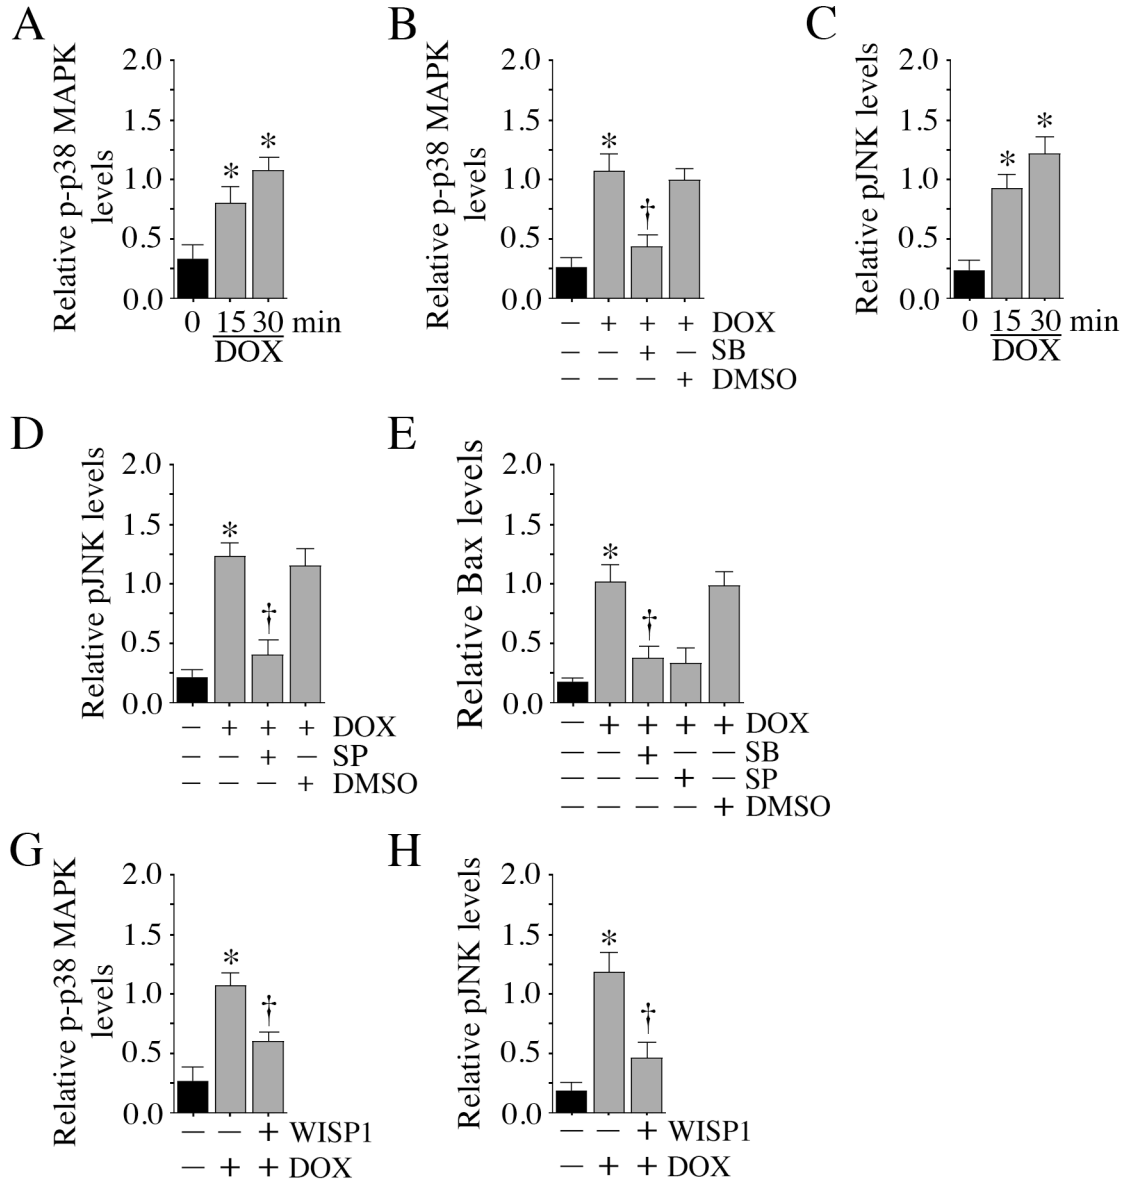

Figure S7

WISP1 blocks doxorubicin cardiotoxicity

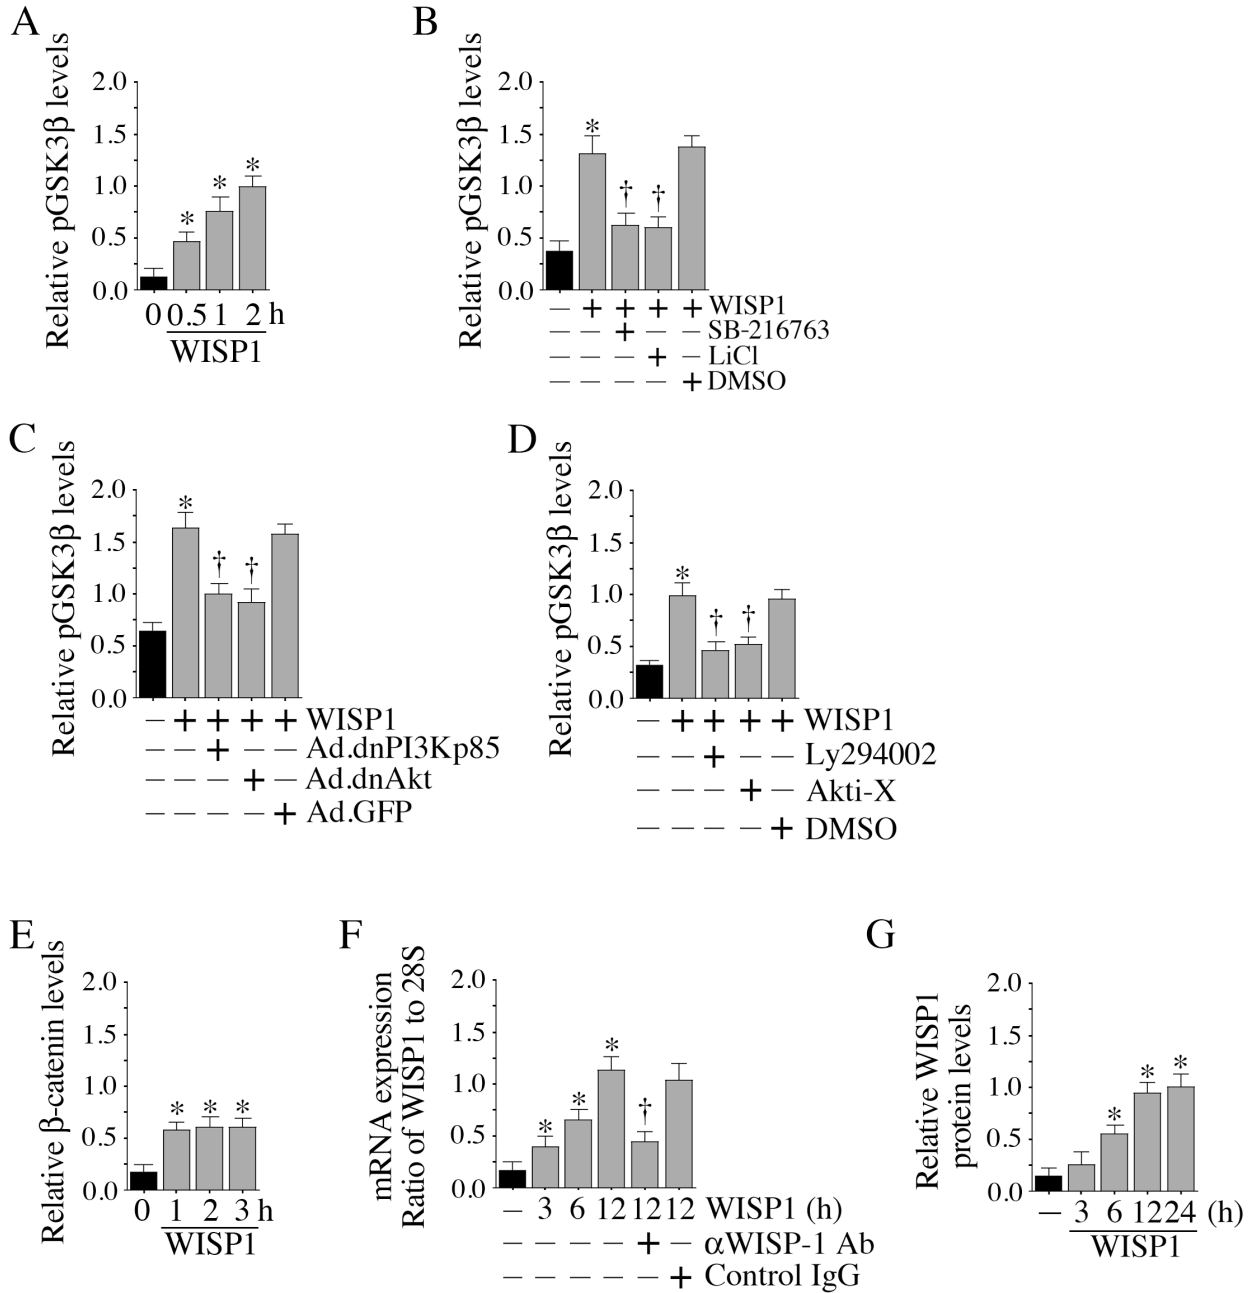

Figure S10
